# Supplementary material for: Asymmetrical diversification of the receptor-ligand interaction controlling self-incompatibility in Arabidopsis
Source: eLife. 2019 Nov 25;8:e50253. doi: 10.7554/eLife.50253 (PMC6908432; doi:10.7554/eLife.50253)
Supplement: Figure 2—source data 1. — Two SRK03 and SRK28 lines were pollinated with A. halleri pollen expressing either S03 or S28 specificities. [file elife-50253-fig2-data1.xlsx]

## Sheet: Sheet1
Receptor line	cross with	Number of germinated pollen grains
SRK03 line 1	SCR03	0
SRK03 line 1	SCR03	0
SRK03 line 1	SCR03	5
SRK03 line 1	SCR03	0
SRK03 line 1	SCR03	0
SRK03 line 1	SCR03	0
SRK03 line 1	SCR03	0
SRK03 line 1	SCR03	0
SRK03 line 1	SCR03	0
SRK03 line 1	SCR03	0
SRK03 line 1	SCR03	0
SRK03 line 1	SCR03	0
SRK03 line 1	SCR28	50
SRK03 line 1	SCR28	50
SRK03 line 1	SCR28	50
SRK03 line 1	SCR28	50
SRK03 line 1	SCR28	50
SRK03 line 1	SCR28	50
SRK03 line 1	SCR28	50
SRK03 line 1	SCR28	50
SRK03 line 1	SCR28	50
SRK03 line 1	SCR28	50
SRK03 line 1	SCR28	50
SRK03 line 1	SCR28	50
SRK03 line 2	SCR03	2
SRK03 line 2	SCR03	0
SRK03 line 2	SCR03	1
SRK03 line 2	SCR03	0
SRK03 line 2	SCR03	0
SRK03 line 2	SCR03	0
SRK03 line 2	SCR03	0
SRK03 line 2	SCR03	0
SRK03 line 2	SCR03	0
SRK03 line 2	SCR03	0
SRK03 line 2	SCR03	0
SRK03 line 2	SCR03	0
SRK03 line 2	SCR03	0
SRK03 line 2	SCR03	0
SRK03 line 2	SCR03	0
SRK03 line 2	SCR28	50
SRK03 line 2	SCR28	50
SRK03 line 2	SCR28	50
SRK03 line 2	SCR28	29
SRK03 line 2	SCR28	15
SRK03 line 2	SCR28	50
SRK03 line 2	SCR28	30
SRK03 line 2	SCR28	50
SRK28 line 1	SCR03	50
SRK28 line 1	SCR03	50
SRK28 line 1	SCR03	50
SRK28 line 1	SCR03	50
SRK28 line 1	SCR03	50
SRK28 line 1	SCR28	0
SRK28 line 1	SCR28	0
SRK28 line 1	SCR28	0
SRK28 line 1	SCR28	0
SRK28 line 1	SCR28	1
SRK28 line 1	SCR28	0
SRK28 line 1	SCR28	0
SRK28 line 1	SCR28	0
SRK28 line 1	SCR28	1
SRK28 line 1	SCR28	1
SRK28 line 1	SCR28	0
SRK28 line 1	SCR28	0
SRK28 line 2	SCR03	50
SRK28 line 2	SCR03	50
SRK28 line 2	SCR03	50
SRK28 line 2	SCR03	50
SRK28 line 2	SCR03	50
SRK28 line 2	SCR03	50
SRK28 line 2	SCR28	0
SRK28 line 2	SCR28	0
SRK28 line 2	SCR28	4
SRK28 line 2	SCR28	0
SRK28 line 2	SCR28	0
SRK28 line 2	SCR28	0
SRK28 line 2	SCR28	0
SRK28 line 2	SCR28	0
SRK28 line 2	SCR28	0
SRK28 line 2	SCR28	0
SRK28 line 2	SCR28	0
