# Supplementary material for: Asymmetrical diversification of the receptor-ligand interaction controlling self-incompatibility in Arabidopsis
Source: eLife. 2019 Nov 25;8:e50253. doi: 10.7554/eLife.50253 (PMC6908432; doi:10.7554/eLife.50253)
Supplement: Figure 3—figure supplement 4—source data 1. — Each SRKa line in S03 and S28 context were pollinated with A. thaliana C24, A. halleri S03 and S28 pollen. [file elife-50253-fig3-figsupp4-data1.xls]

## Sheet: Sheet1
Receptor line	cross with	Nomber of germinated pollen grains
p03_SRKaIA_k03 line 4	C24	50
p03_SRKaIA_k03 line 4	C24	50
p03_SRKaIA_k03 line 4	C24	50
p03_SRKaIA_k03 line 4	C24	50
p03_SRKaIA_k03 line 4	C24	50
p03_SRKaIA_k03 line 4	C24	50
p03_SRKaIA_k03 line 4	SCR03	50
p03_SRKaIA_k03 line 4	SCR03	50
p03_SRKaIA_k03 line 4	SCR03	50
p03_SRKaIA_k03 line 4	SCR03	50
p03_SRKaIA_k03 line 4	SCR03	50
p03_SRKaIA_k03 line 4	SCR03	50
p03_SRKaIA_k03 line 4	SCR03	50
p03_SRKaIA_k03 line 4	SCR28	50
p03_SRKaIA_k03 line 4	SCR28	50
p03_SRKaIA_k03 line 4	SCR28	50
p03_SRKaIA_k03 line 4	SCR28	50
p03_SRKaIA_k03 line 4	SCR28	50
p03_SRKaIA_k03 line 4	SCR28	50
p03_SRKaIA_k03 line 4	SCR28	50
p28_SRKaMA_k28 line 3	C24	50
p28_SRKaMA_k28 line 3	C24	50
p28_SRKaMA_k28 line 3	C24	50
p28_SRKaMA_k28 line 3	C24	50
p28_SRKaMA_k28 line 3	C24	50
p28_SRKaMA_k28 line 3	C24	50
p28_SRKaMA_k28 line 3	C24	50
p28_SRKaMA_k28 line 3	C24	50
p28_SRKaMA_k28 line 3	C24	50
p28_SRKaMA_k28 line 3	C24	50
p28_SRKaMA_k28 line 3	SCR03	50
p28_SRKaMA_k28 line 3	SCR03	50
p28_SRKaMA_k28 line 3	SCR03	50
p28_SRKaMA_k28 line 3	SCR03	50
p28_SRKaMA_k28 line 3	SCR03	50
p28_SRKaMA_k28 line 3	SCR28	50
p28_SRKaMA_k28 line 3	SCR28	50
p28_SRKaMA_k28 line 3	SCR28	50
p28_SRKaMA_k28 line 3	SCR28	50
p28_SRKaMA_k28 line 3	SCR28	50
p28_SRKaMA_k28 line 4	C24	50
p28_SRKaMA_k28 line 4	C24	50
p28_SRKaMA_k28 line 4	C24	50
p28_SRKaMA_k28 line 4	C24	50
p28_SRKaMA_k28 line 4	C24	50
p28_SRKaMA_k28 line 4	C24	50
p28_SRKaMA_k28 line 4	SCR03	50
p28_SRKaMA_k28 line 4	SCR03	50
p28_SRKaMA_k28 line 4	SCR03	50
p28_SRKaMA_k28 line 4	SCR03	50
p28_SRKaMA_k28 line 4	SCR03	50
p28_SRKaMA_k28 line 4	SCR03	50
p28_SRKaMA_k28 line 4	SCR03	50
p28_SRKaMA_k28 line 4	SCR28	50
p28_SRKaMA_k28 line 4	SCR28	50
p28_SRKaMA_k28 line 4	SCR28	50
p28_SRKaMA_k28 line 4	SCR28	50
p28_SRKaMA_k28 line 4	SCR28	50
p28_SRKaMA_k28 line 4	SCR28	50
p28_SRKaMA_k28 line 5	C24	50
p28_SRKaMA_k28 line 5	C24	50
p28_SRKaMA_k28 line 5	C24	50
p28_SRKaMA_k28 line 5	C24	50
p28_SRKaMA_k28 line 5	C24	50
p28_SRKaMA_k28 line 5	C24	50
p28_SRKaMA_k28 line 5	SCR03	50
p28_SRKaMA_k28 line 5	SCR03	50
p28_SRKaMA_k28 line 5	SCR03	50
p28_SRKaMA_k28 line 5	SCR03	50
p28_SRKaMA_k28 line 5	SCR03	50
p28_SRKaMA_k28 line 5	SCR28	50
p28_SRKaMA_k28 line 5	SCR28	50
p28_SRKaMA_k28 line 5	SCR28	50
p03_SRKaMG_k03 line 3	C24	50
p03_SRKaMG_k03 line 3	C24	50
p03_SRKaMG_k03 line 3	C24	50
p03_SRKaMG_k03 line 3	C24	50
p03_SRKaMG_k03 line 3	C24	50
p03_SRKaMG_k03 line 3	SCR03	50
p03_SRKaMG_k03 line 3	SCR03	50
p03_SRKaMG_k03 line 3	SCR03	50
p03_SRKaMG_k03 line 3	SCR03	50
p03_SRKaMG_k03 line 3	SCR03	50
p03_SRKaMG_k03 line 3	SCR03	50
p03_SRKaMG_k03 line 3	SCR03	50
p03_SRKaMG_k03 line 3	SCR28	50
p03_SRKaMG_k03 line 3	SCR28	50
p03_SRKaMG_k03 line 3	SCR28	50
p03_SRKaMG_k03 line 3	SCR28	50
p03_SRKaMG_k03 line 3	SCR28	50
p03_SRKaMG_k03 line 3	SCR28	50
p03_SRKaMG_k03 line 3	SCR28	50
p03_SRKaMG_k03 line 3	SCR28	50
