# Supplementary material for: Asymmetrical diversification of the receptor-ligand interaction controlling self-incompatibility in Arabidopsis
Source: eLife. 2019 Nov 25;8:e50253. doi: 10.7554/eLife.50253 (PMC6908432; doi:10.7554/eLife.50253)
Supplement: Figure 3—source data 1. — Each SRKa line was pollinated with A. thaliana C24, A. halleri S03 and S28 pollen. [file elife-50253-fig3-data1.xls]

## Sheet: Sheet1
Receptor line	cross with	Number of germinated pollen grains
p03_SRKaIA_k03 line 1	C24	50
p03_SRKaIA_k03 line 1	C24	50
p03_SRKaIA_k03 line 1	C24	50
p03_SRKaIA_k03 line 1	C24	50
p03_SRKaIA_k03 line 1	C24	50
p03_SRKaIA_k03 line 1	C24	50
p03_SRKaIA_k03 line 1	C24	50
p03_SRKaIA_k03 line 1	C24	50
p03_SRKaIA_k03 line 1	SCR03	0
p03_SRKaIA_k03 line 1	SCR03	2
p03_SRKaIA_k03 line 1	SCR03	0
p03_SRKaIA_k03 line 1	SCR03	0
p03_SRKaIA_k03 line 1	SCR03	0
p03_SRKaIA_k03 line 1	SCR03	0
p03_SRKaIA_k03 line 1	SCR03	0
p03_SRKaIA_k03 line 1	SCR03	34
p03_SRKaIA_k03 line 1	SCR03	27
p03_SRKaIA_k03 line 1	SCR03	50
p03_SRKaIA_k03 line 1	SCR03	12
p03_SRKaIA_k03 line 1	SCR03	22
p03_SRKaIA_k03 line 1	SCR28	50
p03_SRKaIA_k03 line 1	SCR28	50
p03_SRKaIA_k03 line 1	SCR28	50
p03_SRKaIA_k03 line 1	SCR28	50
p03_SRKaIA_k03 line 1	SCR28	50
p03_SRKaIA_k03 line 1	SCR28	50
p03_SRKaIA_k03 line 1	SCR28	50
p03_SRKaIA_k03 line 2	C24	50
p03_SRKaIA_k03 line 2	C24	50
p03_SRKaIA_k03 line 2	C24	50
p03_SRKaIA_k03 line 2	C24	50
p03_SRKaIA_k03 line 2	C24	50
p03_SRKaIA_k03 line 2	C24	50
p03_SRKaIA_k03 line 2	SCR03	5
p03_SRKaIA_k03 line 2	SCR03	3
p03_SRKaIA_k03 line 2	SCR03	1
p03_SRKaIA_k03 line 2	SCR03	0
p03_SRKaIA_k03 line 2	SCR03	27
p03_SRKaIA_k03 line 2	SCR03	40
p03_SRKaIA_k03 line 2	SCR28	50
p03_SRKaIA_k03 line 2	SCR28	50
p03_SRKaIA_k03 line 2	SCR28	50
p03_SRKaIA_k03 line 2	SCR28	50
p03_SRKaIA_k03 line 2	SCR28	50
p03_SRKaIA_k03 line 2	SCR28	50
p03_SRKaIA_k03 line 2	SCR28	50
p03_SRKaIA_k03 line 2	SCR28	50
p03_SRKaIA_k03 line 3	C24	50
p03_SRKaIA_k03 line 3	C24	50
p03_SRKaIA_k03 line 3	C24	50
p03_SRKaIA_k03 line 3	C24	50
p03_SRKaIA_k03 line 3	C24	50
p03_SRKaIA_k03 line 3	C24	50
p03_SRKaIA_k03 line 3	C24	50
p03_SRKaIA_k03 line 3	SCR03	50
p03_SRKaIA_k03 line 3	SCR03	50
p03_SRKaIA_k03 line 3	SCR03	50
p03_SRKaIA_k03 line 3	SCR03	49
p03_SRKaIA_k03 line 3	SCR03	20
p03_SRKaIA_k03 line 3	SCR03	50
p03_SRKaIA_k03 line 3	SCR28	50
p03_SRKaIA_k03 line 3	SCR28	0
p03_SRKaIA_k03 line 3	SCR28	50
p03_SRKaIA_k03 line 3	SCR28	50
p03_SRKaIA_k03 line 3	SCR28	50
p03_SRKaIA_k03 line 3	SCR28	50
p03_SRKaIA_k03 line 3	SCR28	50
p03_SRKaIA_k03 line 3	SCR28	50
p28_SRKaIA_k28 line 1	C24	50
p28_SRKaIA_k28 line 1	C24	50
p28_SRKaIA_k28 line 1	C24	50
p28_SRKaIA_k28 line 1	C24	50
p28_SRKaIA_k28 line 1	C24	50
p28_SRKaIA_k28 line 1	C24	50
p28_SRKaIA_k28 line 1	SCR03	0
p28_SRKaIA_k28 line 1	SCR03	0
p28_SRKaIA_k28 line 1	SCR03	0
p28_SRKaIA_k28 line 1	SCR03	0
p28_SRKaIA_k28 line 1	SCR03	0
p28_SRKaIA_k28 line 1	SCR03	50
p28_SRKaIA_k28 line 1	SCR03	50
p28_SRKaIA_k28 line 1	SCR03	50
p28_SRKaIA_k28 line 1	SCR28	50
p28_SRKaIA_k28 line 1	SCR28	50
p28_SRKaIA_k28 line 1	SCR28	50
p28_SRKaIA_k28 line 1	SCR28	50
p28_SRKaIA_k28 line 2	C24	50
p28_SRKaIA_k28 line 2	C24	50
p28_SRKaIA_k28 line 2	C24	50
p28_SRKaIA_k28 line 2	C24	50
p28_SRKaIA_k28 line 2	C24	50
p28_SRKaIA_k28 line 2	C24	50
p28_SRKaIA_k28 line 2	C24	50
p28_SRKaIA_k28 line 2	SCR03	0
p28_SRKaIA_k28 line 2	SCR03	0
p28_SRKaIA_k28 line 2	SCR03	0
p28_SRKaIA_k28 line 2	SCR03	19
p28_SRKaIA_k28 line 2	SCR03	21
p28_SRKaIA_k28 line 2	SCR03	22
p28_SRKaIA_k28 line 2	SCR03	14
p28_SRKaIA_k28 line 2	SCR03	22
p28_SRKaIA_k28 line 2	SCR28	50
p28_SRKaIA_k28 line 2	SCR28	50
p28_SRKaIA_k28 line 2	SCR28	50
p28_SRKaIA_k28 line 2	SCR28	50
p28_SRKaIA_k28 line 2	SCR28	50
p28_SRKaIA_k28 line 2	SCR28	50
p28_SRKaIA_k28 line 3	C24	50
p28_SRKaIA_k28 line 3	C24	50
p28_SRKaIA_k28 line 3	C24	50
p28_SRKaIA_k28 line 3	C24	50
p28_SRKaIA_k28 line 3	C24	50
p28_SRKaIA_k28 line 3	C24	50
p28_SRKaIA_k28 line 3	SCR03	3
p28_SRKaIA_k28 line 3	SCR03	1
p28_SRKaIA_k28 line 3	SCR03	50
p28_SRKaIA_k28 line 3	SCR03	20
p28_SRKaIA_k28 line 3	SCR03	50
p28_SRKaIA_k28 line 3	SCR03	50
p28_SRKaIA_k28 line 3	SCR03	50
p28_SRKaIA_k28 line 3	SCR03	50
p28_SRKaIA_k28 line 3	SCR03	50
p28_SRKaIA_k28 line 3	SCR03	50
p28_SRKaIA_k28 line 3	SCR28	50
p28_SRKaIA_k28 line 3	SCR28	50
p28_SRKaIA_k28 line 3	SCR28	50
p28_SRKaIA_k28 line 3	SCR28	50
p28_SRKaIA_k28 line 3	SCR28	50
p28_SRKaIA_k28 line 3	SCR28	50
p28_SRKaIA_k28 line 4	C24	50
p28_SRKaIA_k28 line 4	C24	50
p28_SRKaIA_k28 line 4	C24	50
p28_SRKaIA_k28 line 4	C24	50
p28_SRKaIA_k28 line 4	C24	50
p28_SRKaIA_k28 line 4	C24	50
p28_SRKaIA_k28 line 4	C24	50
p28_SRKaIA_k28 line 4	SCR03	4
p28_SRKaIA_k28 line 4	SCR03	3
p28_SRKaIA_k28 line 4	SCR03	6
p28_SRKaIA_k28 line 4	SCR03	14
p28_SRKaIA_k28 line 4	SCR03	12
p28_SRKaIA_k28 line 4	SCR03	0
p28_SRKaIA_k28 line 4	SCR03	6
p28_SRKaIA_k28 line 4	SCR28	50
p28_SRKaIA_k28 line 4	SCR28	50
p28_SRKaIA_k28 line 4	SCR28	50
p28_SRKaIA_k28 line 4	SCR28	50
p03_SRKaIG_k03 line 1	C24	50
p03_SRKaIG_k03 line 1	C24	50
p03_SRKaIG_k03 line 1	C24	50
p03_SRKaIG_k03 line 1	C24	50
p03_SRKaIG_k03 line 1	C24	50
p03_SRKaIG_k03 line 1	C24	50
p03_SRKaIG_k03 line 1	C24	50
p03_SRKaIG_k03 line 1	C24	50
p03_SRKaIG_k03 line 1	SCR03	2
p03_SRKaIG_k03 line 1	SCR03	47
p03_SRKaIG_k03 line 1	SCR03	34
p03_SRKaIG_k03 line 1	SCR03	49
p03_SRKaIG_k03 line 1	SCR03	14
p03_SRKaIG_k03 line 1	SCR03	25
p03_SRKaIG_k03 line 1	SCR03	50
p03_SRKaIG_k03 line 1	SCR28	0
p03_SRKaIG_k03 line 1	SCR28	50
p03_SRKaIG_k03 line 1	SCR28	50
p03_SRKaIG_k03 line 1	SCR28	50
p03_SRKaIG_k03 line 1	SCR28	50
p03_SRKaIG_k03 line 1	SCR28	50
p03_SRKaIG_k03 line 1	SCR28	50
p03_SRKaIG_k03 line 1	SCR28	50
p03_SRKaIG_k03 line 1	SCR28	50
p03_SRKaIG_k03 line 1	SCR28	50
p03_SRKaIG_k03 line 2	C24	50
p03_SRKaIG_k03 line 2	C24	50
p03_SRKaIG_k03 line 2	C24	50
p03_SRKaIG_k03 line 2	C24	50
p03_SRKaIG_k03 line 2	C24	50
p03_SRKaIG_k03 line 2	C24	50
p03_SRKaIG_k03 line 2	SCR03	16
p03_SRKaIG_k03 line 2	SCR03	50
p03_SRKaIG_k03 line 2	SCR03	0
p03_SRKaIG_k03 line 2	SCR03	25
p03_SRKaIG_k03 line 2	SCR03	50
p03_SRKaIG_k03 line 2	SCR03	25
p03_SRKaIG_k03 line 2	SCR03	19
p03_SRKaIG_k03 line 2	SCR03	18
p03_SRKaIG_k03 line 2	SCR03	50
p03_SRKaIG_k03 line 2	SCR03	12
p03_SRKaIG_k03 line 2	SCR28	50
p03_SRKaIG_k03 line 2	SCR28	50
p03_SRKaIG_k03 line 2	SCR28	49
p03_SRKaIG_k03 line 2	SCR28	50
p03_SRKaIG_k03 line 2	SCR28	50
p03_SRKaIG_k03 line 2	SCR28	50
p03_SRKaIG_k03 line 3	C24	50
p03_SRKaIG_k03 line 3	C24	50
p03_SRKaIG_k03 line 3	C24	50
p03_SRKaIG_k03 line 3	C24	50
p03_SRKaIG_k03 line 3	C24	50
p03_SRKaIG_k03 line 3	C24	50
p03_SRKaIG_k03 line 3	C24	50
p03_SRKaIG_k03 line 3	SCR03	50
p03_SRKaIG_k03 line 3	SCR03	25
p03_SRKaIG_k03 line 3	SCR03	50
p03_SRKaIG_k03 line 3	SCR03	18
p03_SRKaIG_k03 line 3	SCR03	28
p03_SRKaIG_k03 line 3	SCR03	10
p03_SRKaIG_k03 line 3	SCR28	50
p03_SRKaIG_k03 line 3	SCR28	50
p03_SRKaIG_k03 line 3	SCR28	49
p03_SRKaIG_k03 line 3	SCR28	50
p03_SRKaIG_k03 line 3	SCR28	50
p28_SRKaIG_k28 line 1	C24	50
p28_SRKaIG_k28 line 1	C24	50
p28_SRKaIG_k28 line 1	C24	50
p28_SRKaIG_k28 line 1	C24	50
p28_SRKaIG_k28 line 1	C24	50
p28_SRKaIG_k28 line 1	C24	50
p28_SRKaIG_k28 line 1	SCR03	50
p28_SRKaIG_k28 line 1	SCR03	40
p28_SRKaIG_k28 line 1	SCR03	50
p28_SRKaIG_k28 line 1	SCR03	40
p28_SRKaIG_k28 line 1	SCR03	5
p28_SRKaIG_k28 line 1	SCR03	21
p28_SRKaIG_k28 line 1	SCR03	2
p28_SRKaIG_k28 line 1	SCR03	0
p28_SRKaIG_k28 line 1	SCR28	50
p28_SRKaIG_k28 line 1	SCR28	50
p28_SRKaIG_k28 line 1	SCR28	50
p28_SRKaIG_k28 line 1	SCR28	50
p28_SRKaIG_k28 line 1	SCR28	0
p28_SRKaIG_k28 line 1	SCR28	50
p28_SRKaIG_k28 line 1	SCR28	50
p28_SRKaIG_k28 line 1	SCR28	50
p28_SRKaIG_k28 line 1	SCR28	50
p28_SRKaIG_k28 line 2	C24	50
p28_SRKaIG_k28 line 2	C24	50
p28_SRKaIG_k28 line 2	C24	50
p28_SRKaIG_k28 line 2	C24	50
p28_SRKaIG_k28 line 2	C24	50
p28_SRKaIG_k28 line 2	C24	50
p28_SRKaIG_k28 line 2	SCR03	50
p28_SRKaIG_k28 line 2	SCR03	50
p28_SRKaIG_k28 line 2	SCR03	20
p28_SRKaIG_k28 line 2	SCR03	50
p28_SRKaIG_k28 line 2	SCR03	50
p28_SRKaIG_k28 line 2	SCR03	50
p28_SRKaIG_k28 line 2	SCR03	50
p28_SRKaIG_k28 line 2	SCR03	50
p28_SRKaIG_k28 line 2	SCR28	50
p28_SRKaIG_k28 line 2	SCR28	50
p28_SRKaIG_k28 line 2	SCR28	50
p28_SRKaIG_k28 line 2	SCR28	50
p28_SRKaIG_k28 line 2	SCR28	50
p28_SRKaIG_k28 line 3	C24	50
p28_SRKaIG_k28 line 3	C24	50
p28_SRKaIG_k28 line 3	C24	50
p28_SRKaIG_k28 line 3	C24	50
p28_SRKaIG_k28 line 3	C24	50
p28_SRKaIG_k28 line 3	C24	50
p28_SRKaIG_k28 line 3	C24	50
p28_SRKaIG_k28 line 3	SCR03	22
p28_SRKaIG_k28 line 3	SCR03	16
p28_SRKaIG_k28 line 3	SCR03	30
p28_SRKaIG_k28 line 3	SCR03	50
p28_SRKaIG_k28 line 3	SCR03	50
p28_SRKaIG_k28 line 3	SCR03	50
p28_SRKaIG_k28 line 3	SCR28	50
p28_SRKaIG_k28 line 3	SCR28	50
p28_SRKaIG_k28 line 3	SCR28	50
p28_SRKaIG_k28 line 3	SCR28	50
p28_SRKaIG_k28 line 3	SCR28	50
p28_SRKaIG_k28 line 3	SCR28	50
p28_SRKaIG_k28 line 4	C24	50
p28_SRKaIG_k28 line 4	C24	50
p28_SRKaIG_k28 line 4	C24	50
p28_SRKaIG_k28 line 4	C24	50
p28_SRKaIG_k28 line 4	C24	50
p28_SRKaIG_k28 line 4	C24	50
p28_SRKaIG_k28 line 4	SCR03	35
p28_SRKaIG_k28 line 4	SCR03	50
p28_SRKaIG_k28 line 4	SCR03	16
p28_SRKaIG_k28 line 4	SCR03	50
p28_SRKaIG_k28 line 4	SCR03	44
p28_SRKaIG_k28 line 4	SCR03	0
p28_SRKaIG_k28 line 4	SCR28	50
p28_SRKaIG_k28 line 4	SCR28	50
p28_SRKaIG_k28 line 4	SCR28	50
p28_SRKaIG_k28 line 4	SCR28	50
p28_SRKaIG_k28 line 4	SCR28	50
p03_SRKaMA_k03 line 1	C24	50
p03_SRKaMA_k03 line 1	C24	50
p03_SRKaMA_k03 line 1	C24	50
p03_SRKaMA_k03 line 1	C24	50
p03_SRKaMA_k03 line 1	C24	50
p03_SRKaMA_k03 line 1	C24	50
p03_SRKaMA_k03 line 1	C24	50
p03_SRKaMA_k03 line 1	C24	50
p03_SRKaMA_k03 line 1	C24	50
p03_SRKaMA_k03 line 1	SCR03	50
p03_SRKaMA_k03 line 1	SCR03	50
p03_SRKaMA_k03 line 1	SCR03	50
p03_SRKaMA_k03 line 1	SCR03	50
p03_SRKaMA_k03 line 1	SCR03	50
p03_SRKaMA_k03 line 1	SCR03	50
p03_SRKaMA_k03 line 1	SCR03	50
p03_SRKaMA_k03 line 1	SCR03	50
p03_SRKaMA_k03 line 1	SCR03	50
p03_SRKaMA_k03 line 1	SCR03	50
p03_SRKaMA_k03 line 1	SCR28	50
p03_SRKaMA_k03 line 1	SCR28	50
p03_SRKaMA_k03 line 1	SCR28	50
p03_SRKaMA_k03 line 1	SCR28	50
p03_SRKaMA_k03 line 1	SCR28	50
p03_SRKaMA_k03 line 1	SCR28	50
p03_SRKaMA_k03 line 1	SCR28	50
p03_SRKaMA_k03 line 2	C24	50
p03_SRKaMA_k03 line 2	C24	50
p03_SRKaMA_k03 line 2	C24	50
p03_SRKaMA_k03 line 2	C24	50
p03_SRKaMA_k03 line 2	C24	50
p03_SRKaMA_k03 line 2	C24	50
p03_SRKaMA_k03 line 2	C24	50
p03_SRKaMA_k03 line 2	C24	50
p03_SRKaMA_k03 line 2	SCR03	50
p03_SRKaMA_k03 line 2	SCR03	49
p03_SRKaMA_k03 line 2	SCR03	50
p03_SRKaMA_k03 line 2	SCR03	50
p03_SRKaMA_k03 line 2	SCR03	50
p03_SRKaMA_k03 line 2	SCR03	40
p03_SRKaMA_k03 line 2	SCR03	41
p03_SRKaMA_k03 line 2	SCR03	46
p03_SRKaMA_k03 line 2	SCR28	0
p03_SRKaMA_k03 line 2	SCR28	0
p03_SRKaMA_k03 line 2	SCR28	50
p03_SRKaMA_k03 line 2	SCR28	50
p28_SRKaMA_k28 line 1	C24	50
p28_SRKaMA_k28 line 1	C24	50
p28_SRKaMA_k28 line 1	C24	50
p28_SRKaMA_k28 line 1	C24	50
p28_SRKaMA_k28 line 1	C24	50
p28_SRKaMA_k28 line 1	C24	50
p28_SRKaMA_k28 line 1	SCR03	49
p28_SRKaMA_k28 line 1	SCR03	50
p28_SRKaMA_k28 line 1	SCR03	50
p28_SRKaMA_k28 line 1	SCR03	50
p28_SRKaMA_k28 line 1	SCR03	50
p28_SRKaMA_k28 line 1	SCR03	50
p28_SRKaMA_k28 line 1	SCR03	50
p28_SRKaMA_k28 line 1	SCR03	50
p28_SRKaMA_k28 line 1	SCR03	34
p28_SRKaMA_k28 line 1	SCR28	50
p28_SRKaMA_k28 line 1	SCR28	50
p28_SRKaMA_k28 line 1	SCR28	50
p28_SRKaMA_k28 line 1	SCR28	49
p28_SRKaMA_k28 line 1	SCR28	50
p28_SRKaMA_k28 line 1	SCR28	50
p28_SRKaMA_k28 line 1	SCR28	0
p28_SRKaMA_k28 line 2	C24	50
p28_SRKaMA_k28 line 2	C24	50
p28_SRKaMA_k28 line 2	C24	50
p28_SRKaMA_k28 line 2	C24	50
p28_SRKaMA_k28 line 2	C24	50
p28_SRKaMA_k28 line 2	C24	50
p28_SRKaMA_k28 line 2	SCR03	34
p28_SRKaMA_k28 line 2	SCR03	30
p28_SRKaMA_k28 line 2	SCR03	40
p28_SRKaMA_k28 line 2	SCR03	42
p28_SRKaMA_k28 line 2	SCR03	34
p28_SRKaMA_k28 line 2	SCR03	49
p28_SRKaMA_k28 line 2	SCR28	50
p28_SRKaMA_k28 line 2	SCR28	49
p28_SRKaMA_k28 line 2	SCR28	50
p28_SRKaMA_k28 line 2	SCR28	50
p28_SRKaMA_k28 line 2	SCR28	50
p28_SRKaMA_k28 line 2	SCR28	49
p28_SRKaMA_k28 line 2	SCR28	50
p03_SRKaMG_k03 line 1	C24	50
p03_SRKaMG_k03 line 1	C24	50
p03_SRKaMG_k03 line 1	C24	50
p03_SRKaMG_k03 line 1	C24	50
p03_SRKaMG_k03 line 1	C24	50
p03_SRKaMG_k03 line 1	C24	50
p03_SRKaMG_k03 line 1	C24	50
p03_SRKaMG_k03 line 1	SCR03	50
p03_SRKaMG_k03 line 1	SCR03	50
p03_SRKaMG_k03 line 1	SCR03	50
p03_SRKaMG_k03 line 1	SCR03	50
p03_SRKaMG_k03 line 1	SCR03	50
p03_SRKaMG_k03 line 1	SCR03	50
p03_SRKaMG_k03 line 1	SCR03	50
p03_SRKaMG_k03 line 1	SCR28	50
p03_SRKaMG_k03 line 1	SCR28	50
p03_SRKaMG_k03 line 1	SCR28	50
p03_SRKaMG_k03 line 1	SCR28	50
p03_SRKaMG_k03 line 1	SCR28	50
p03_SRKaMG_k03 line 2	C24	50
p03_SRKaMG_k03 line 2	C24	50
p03_SRKaMG_k03 line 2	C24	50
p03_SRKaMG_k03 line 2	C24	50
p03_SRKaMG_k03 line 2	C24	50
p03_SRKaMG_k03 line 2	C24	50
p03_SRKaMG_k03 line 2	C24	50
p03_SRKaMG_k03 line 2	C24	50
p03_SRKaMG_k03 line 2	SCR03	49
p03_SRKaMG_k03 line 2	SCR03	49
p03_SRKaMG_k03 line 2	SCR03	49
p03_SRKaMG_k03 line 2	SCR03	49
p03_SRKaMG_k03 line 2	SCR03	50
p03_SRKaMG_k03 line 2	SCR28	50
p03_SRKaMG_k03 line 2	SCR28	50
p03_SRKaMG_k03 line 2	SCR28	50
p03_SRKaMG_k03 line 2	SCR28	50
p28_SRKaMG_k28 line 1	C24	50
p28_SRKaMG_k28 line 1	C24	50
p28_SRKaMG_k28 line 1	C24	50
p28_SRKaMG_k28 line 1	C24	50
p28_SRKaMG_k28 line 1	C24	50
p28_SRKaMG_k28 line 1	C24	50
p28_SRKaMG_k28 line 1	SCR03	49
p28_SRKaMG_k28 line 1	SCR03	42
p28_SRKaMG_k28 line 1	SCR03	50
p28_SRKaMG_k28 line 1	SCR03	50
p28_SRKaMG_k28 line 1	SCR03	50
p28_SRKaMG_k28 line 1	SCR03	50
p28_SRKaMG_k28 line 1	SCR03	50
p28_SRKaMG_k28 line 1	SCR03	50
p28_SRKaMG_k28 line 1	SCR28	50
p28_SRKaMG_k28 line 1	SCR28	50
p28_SRKaMG_k28 line 1	SCR28	50
p28_SRKaMG_k28 line 1	SCR28	50
p28_SRKaMG_k28 line 1	SCR28	50
p28_SRKaMG_k28 line 2	C24	50
p28_SRKaMG_k28 line 2	C24	50
p28_SRKaMG_k28 line 2	C24	50
p28_SRKaMG_k28 line 2	C24	50
p28_SRKaMG_k28 line 2	C24	50
p28_SRKaMG_k28 line 2	C24	50
p28_SRKaMG_k28 line 2	SCR03	50
p28_SRKaMG_k28 line 2	SCR03	49
p28_SRKaMG_k28 line 2	SCR03	50
p28_SRKaMG_k28 line 2	SCR03	35
p28_SRKaMG_k28 line 2	SCR03	50
p28_SRKaMG_k28 line 2	SCR03	50
p28_SRKaMG_k28 line 2	SCR03	50
p28_SRKaMG_k28 line 2	SCR03	31
p28_SRKaMG_k28 line 2	SCR28	50
p28_SRKaMG_k28 line 2	SCR28	50
p28_SRKaMG_k28 line 3	C24	50
p28_SRKaMG_k28 line 3	C24	50
p28_SRKaMG_k28 line 3	C24	50
p28_SRKaMG_k28 line 3	C24	50
p28_SRKaMG_k28 line 3	C24	50
p28_SRKaMG_k28 line 3	C24	50
p28_SRKaMG_k28 line 3	C24	50
p28_SRKaMG_k28 line 3	C24	50
p28_SRKaMG_k28 line 3	SCR03	50
p28_SRKaMG_k28 line 3	SCR03	50
p28_SRKaMG_k28 line 3	SCR03	50
p28_SRKaMG_k28 line 3	SCR03	50
p28_SRKaMG_k28 line 3	SCR03	50
p28_SRKaMG_k28 line 3	SCR03	50
p28_SRKaMG_k28 line 3	SCR03	50
p28_SRKaMG_k28 line 3	SCR28	50
p28_SRKaMG_k28 line 3	SCR28	50
p28_SRKaMG_k28 line 3	SCR28	49
p28_SRKaMG_k28 line 3	SCR28	50
p28_SRKaMG_k28 line 3	SCR28	50
p28_SRKaMG_k28 line 4	C24	50
p28_SRKaMG_k28 line 4	C24	50
p28_SRKaMG_k28 line 4	C24	50
p28_SRKaMG_k28 line 4	C24	50
p28_SRKaMG_k28 line 4	C24	50
p28_SRKaMG_k28 line 4	C24	50
p28_SRKaMG_k28 line 4	C24	50
p28_SRKaMG_k28 line 4	C24	50
p28_SRKaMG_k28 line 4	C24	50
p28_SRKaMG_k28 line 4	C24	50
p28_SRKaMG_k28 line 4	SCR03	14
p28_SRKaMG_k28 line 4	SCR03	15
p28_SRKaMG_k28 line 4	SCR03	23
p28_SRKaMG_k28 line 4	SCR03	37
p28_SRKaMG_k28 line 4	SCR03	50
p28_SRKaMG_k28 line 4	SCR03	50
p28_SRKaMG_k28 line 4	SCR28	50
p28_SRKaMG_k28 line 4	SCR28	50
p28_SRKaMG_k28 line 4	SCR28	50
p28_SRKaMG_k28 line 4	SCR28	50
p28_SRKaMG_k28 line 4	SCR28	50
