# Supplementary material for: Asymmetrical diversification of the receptor-ligand interaction controlling self-incompatibility in Arabidopsis
Source: eLife journal article supplement (doi:10.7554/elife.50253), 2019-11-25

| <b>A</b>    | <b>Complex 1<br/>SRK03/SCR03</b> | <b>Complex 2<br/>SRK28/SCR28</b> |             |
|-------------|----------------------------------|----------------------------------|-------------|
| AA position | Nbr of contacts                  | Nbr of contacts                  | Differences |
| 279         | 125 (8.10)                       | 43 (3.08)                        | 82 (5.02)   |
| 296         | 89 (5.77)                        | 23 (1.65)                        | 66 (4.12)   |
| 201         | 0 (0.00)                         | 33 (2.37)                        | -33 (-2.37) |
| 220         | 69 (4.47)                        | 126 (0.03)                       | -57 (-4.56) |

| <b>B</b>    | <b>SRK03/SCR03</b> | <b>SRK03/SCR28</b> |             |
|-------------|--------------------|--------------------|-------------|
| AA position | Nbr of contacts    | Nbr of contacts    | Differences |
| 296         | 89 (5.77)          | 27 (1.75)          | 62 (4.02)   |
| 279         | 125 (8.10)         | 87 (5.63)          | 38 (2.47)   |
| 292         | 18 (1.17)          | 54 (3.49)          | -36 (-2.33) |
| 220         | 69 (4.47)          | 108 (6.99)         | -39 (-2.51) |

| <b>C</b>    | <b>SRK28/SCR28</b> | <b>SRK28/SCR03</b> |             |
|-------------|--------------------|--------------------|-------------|
| AA position | Nbr of contacts    | Nbr of contacts    | Differences |
| 220         | 126 (9.03)         | 74 (5.61)          | 52 (3.42)   |
| 201         | 33 (2.37)          | 5 (0.38)           | 28 (1.99)   |
| 281         | 15 (1.08)          | 44 (3.34)          | -29 (-2.26) |
| 279         | 43 (3.08)          | 87 (6.60)          | -44 (-3.52) |

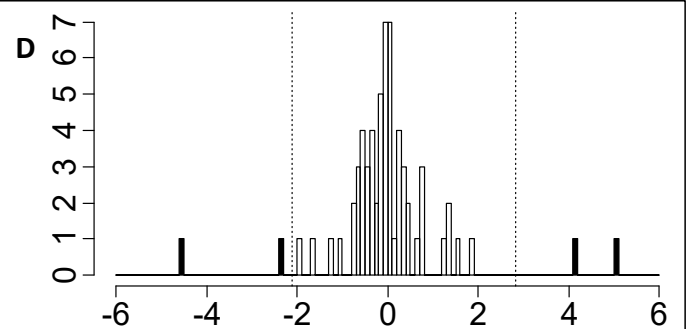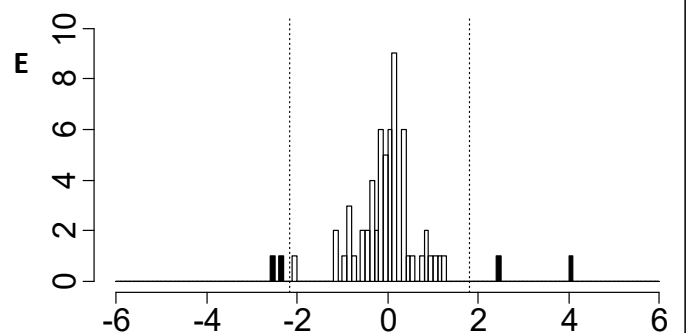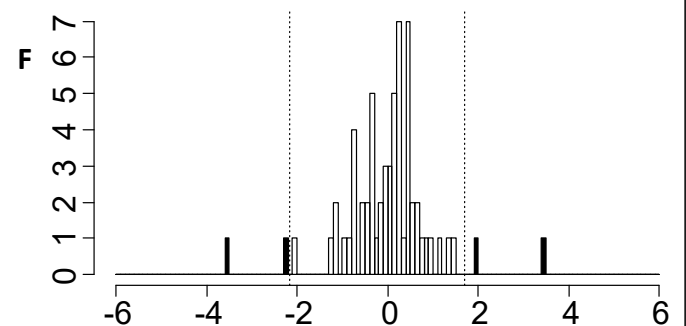

Supplement: supp [file elife-50253-supp-v1.zip]
