# Supplementary figures and images for: Asymmetrical diversification of the receptor-ligand interaction controlling self-incompatibility in Arabidopsis
Source: eLife journal article supplement (doi:10.7554/elife.50253), 2019-11-25

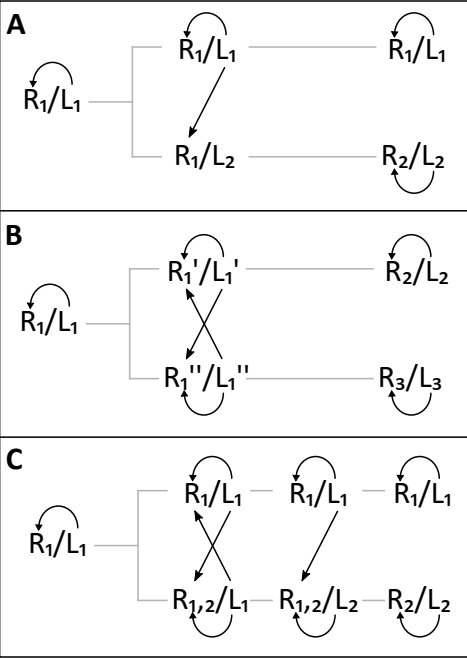

Supplement: supp [file elife-50253-supp-v1.zip]

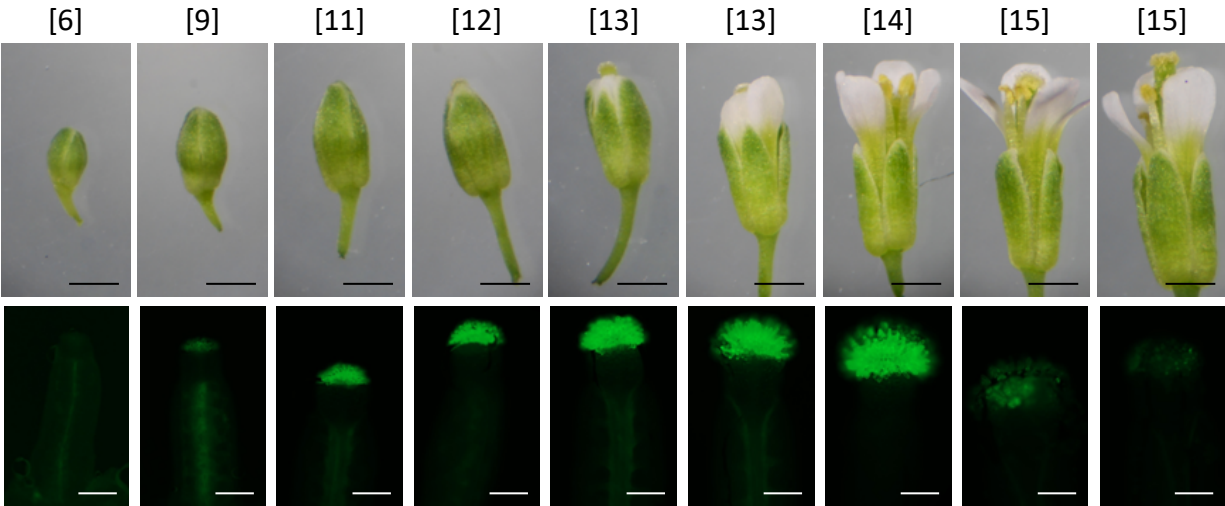

Supplement: supp [file elife-50253-supp-v1.zip]

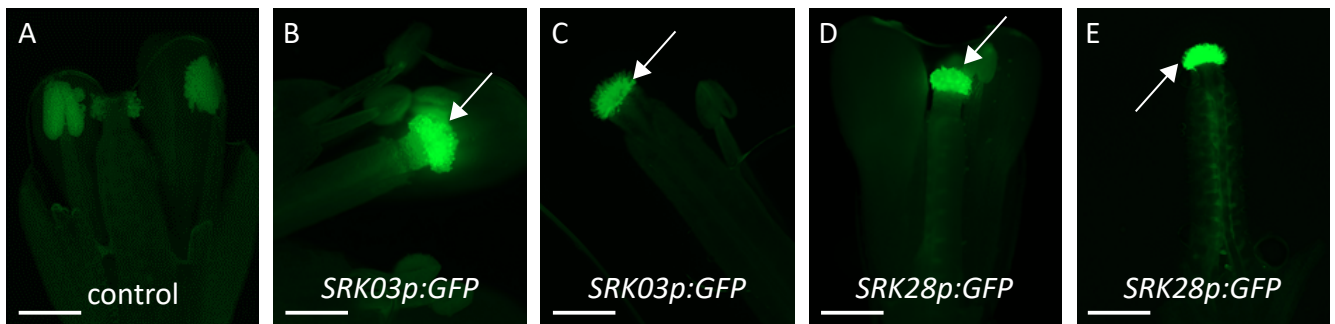

Supplement: supp [file elife-50253-supp-v1.zip]

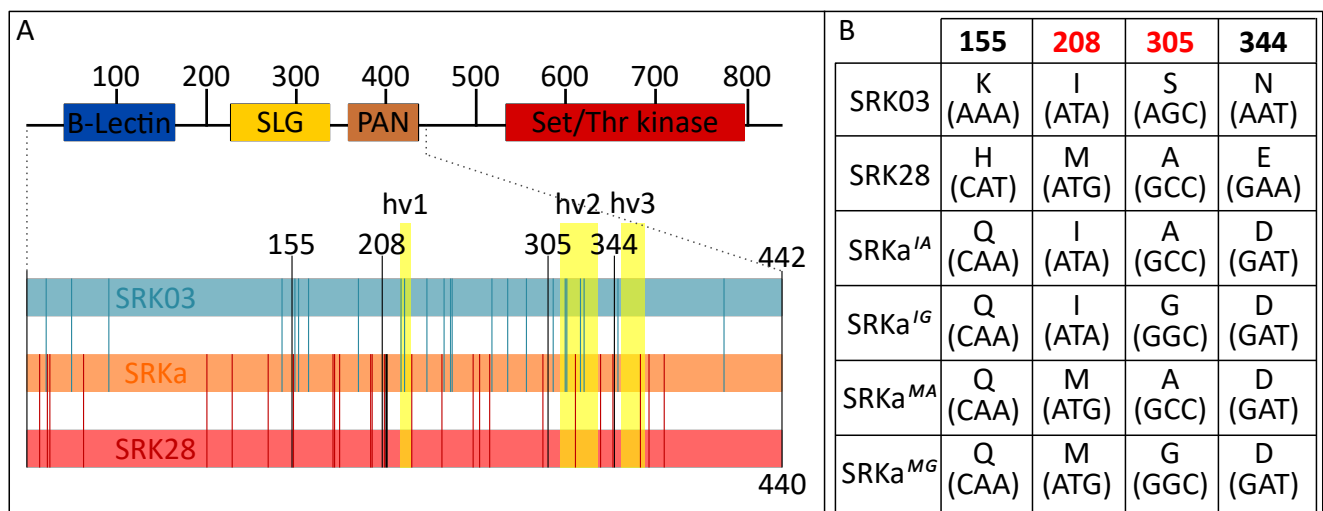

Supplement: supp [file elife-50253-supp-v1.zip]

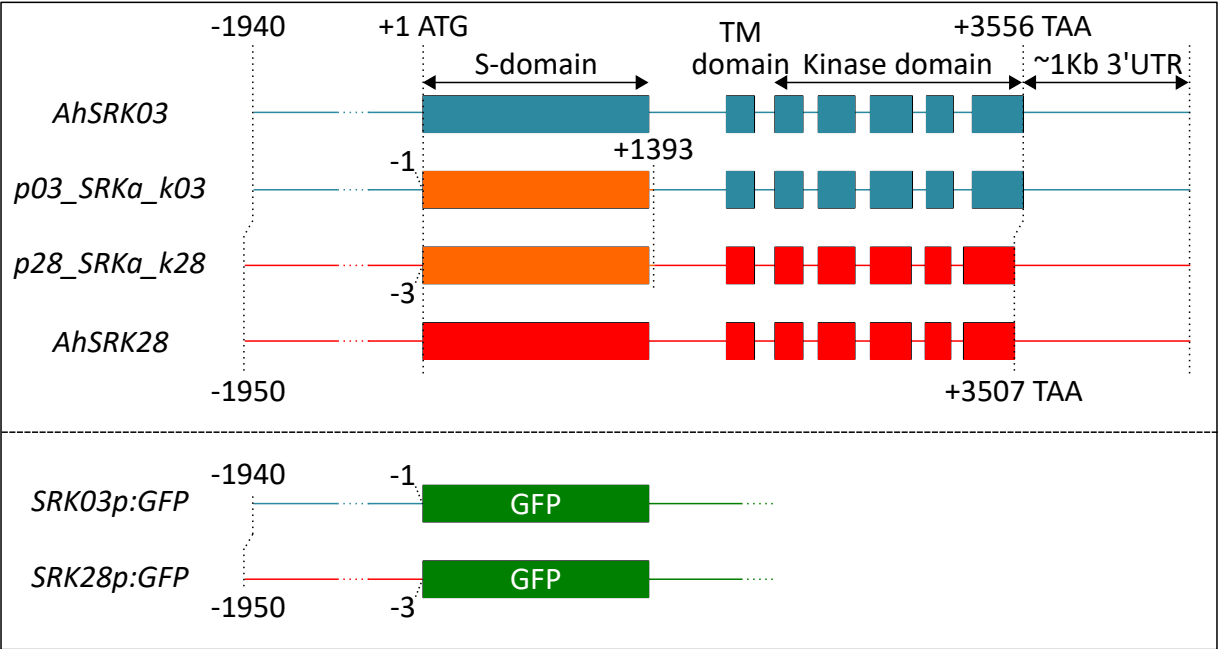

Supplement: supp [file elife-50253-supp-v1.zip]

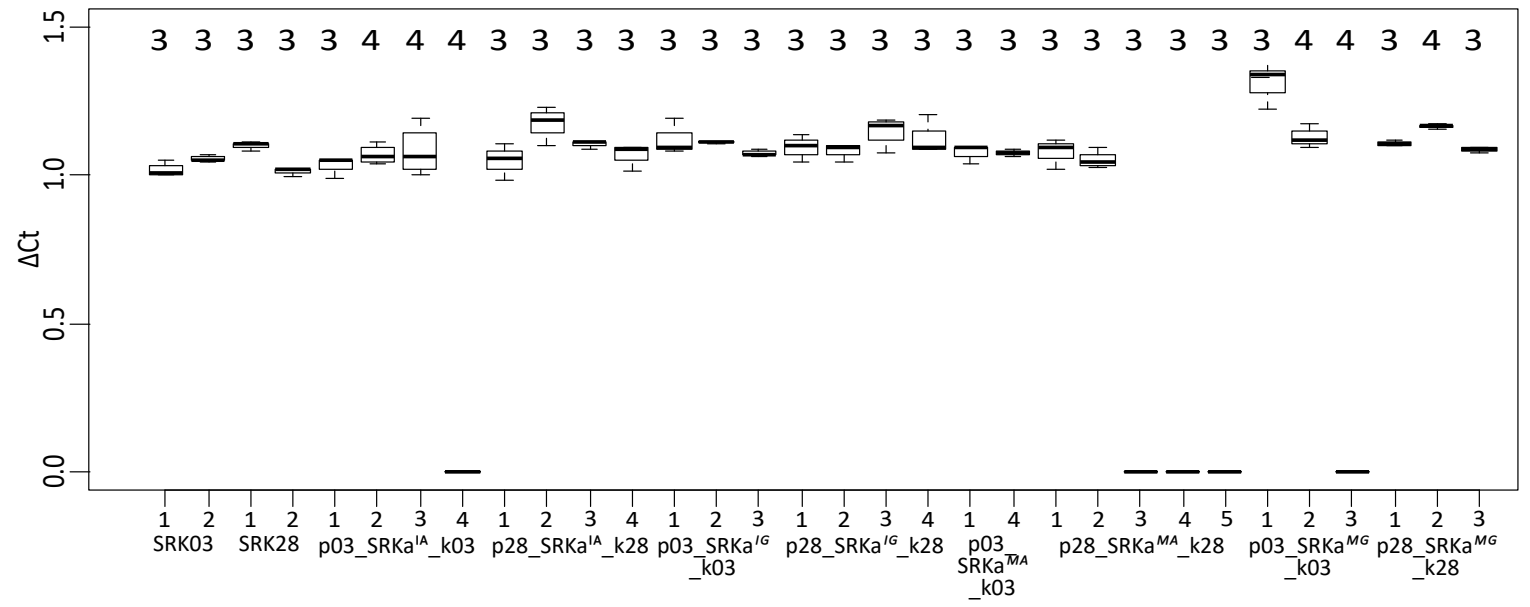

Supplement: supp [file elife-50253-supp-v1.zip]

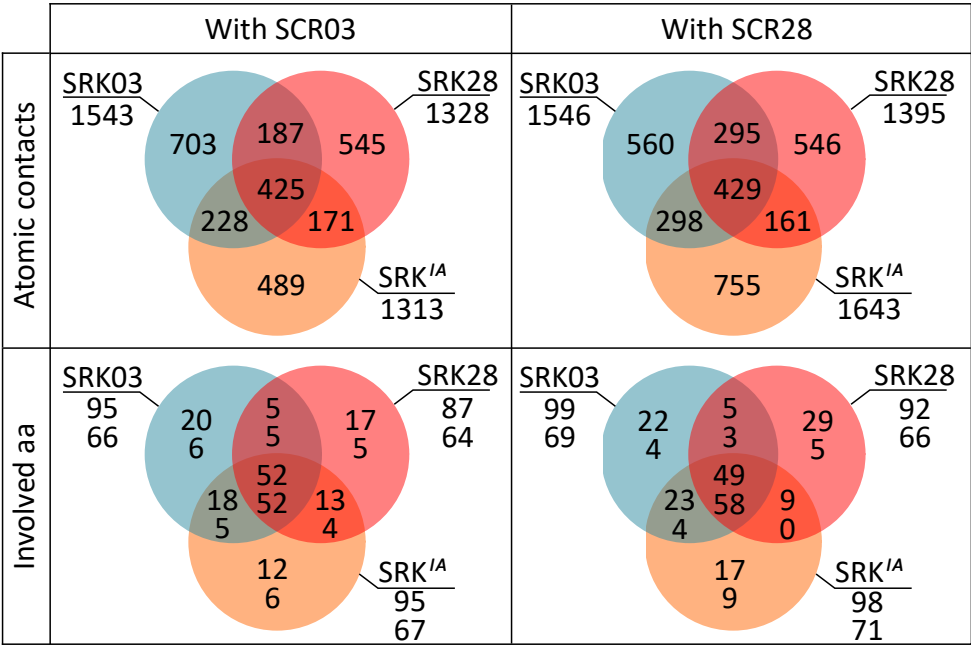

Supplement: supp [file elife-50253-supp-v1.zip]

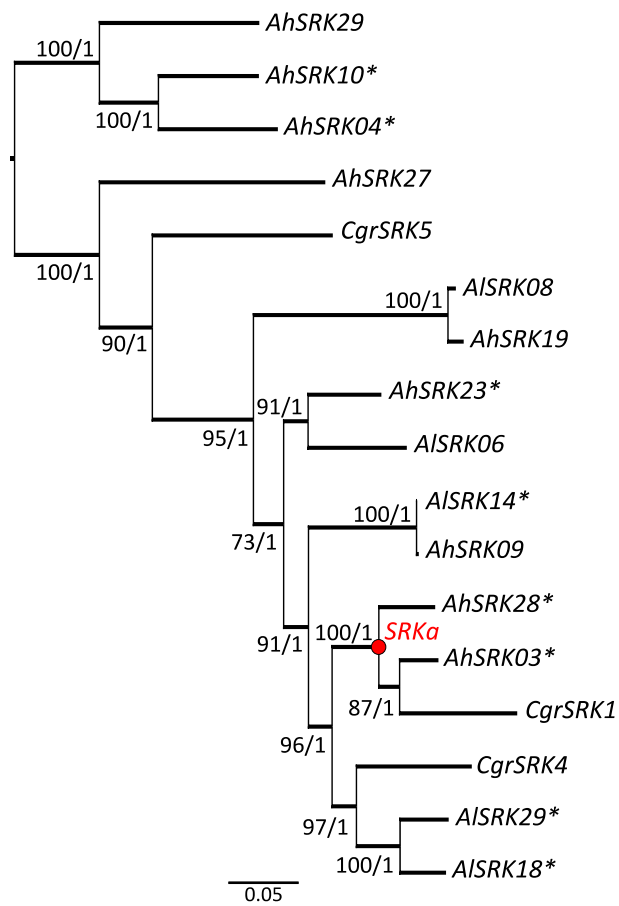

Supplement: supp [file elife-50253-supp-v1.zip]

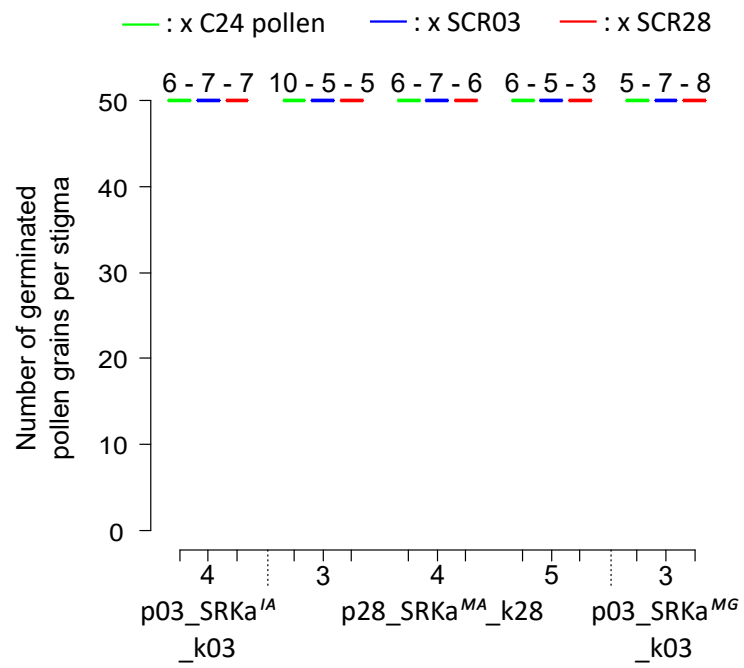

Supplement: supp [file elife-50253-supp-v1.zip]

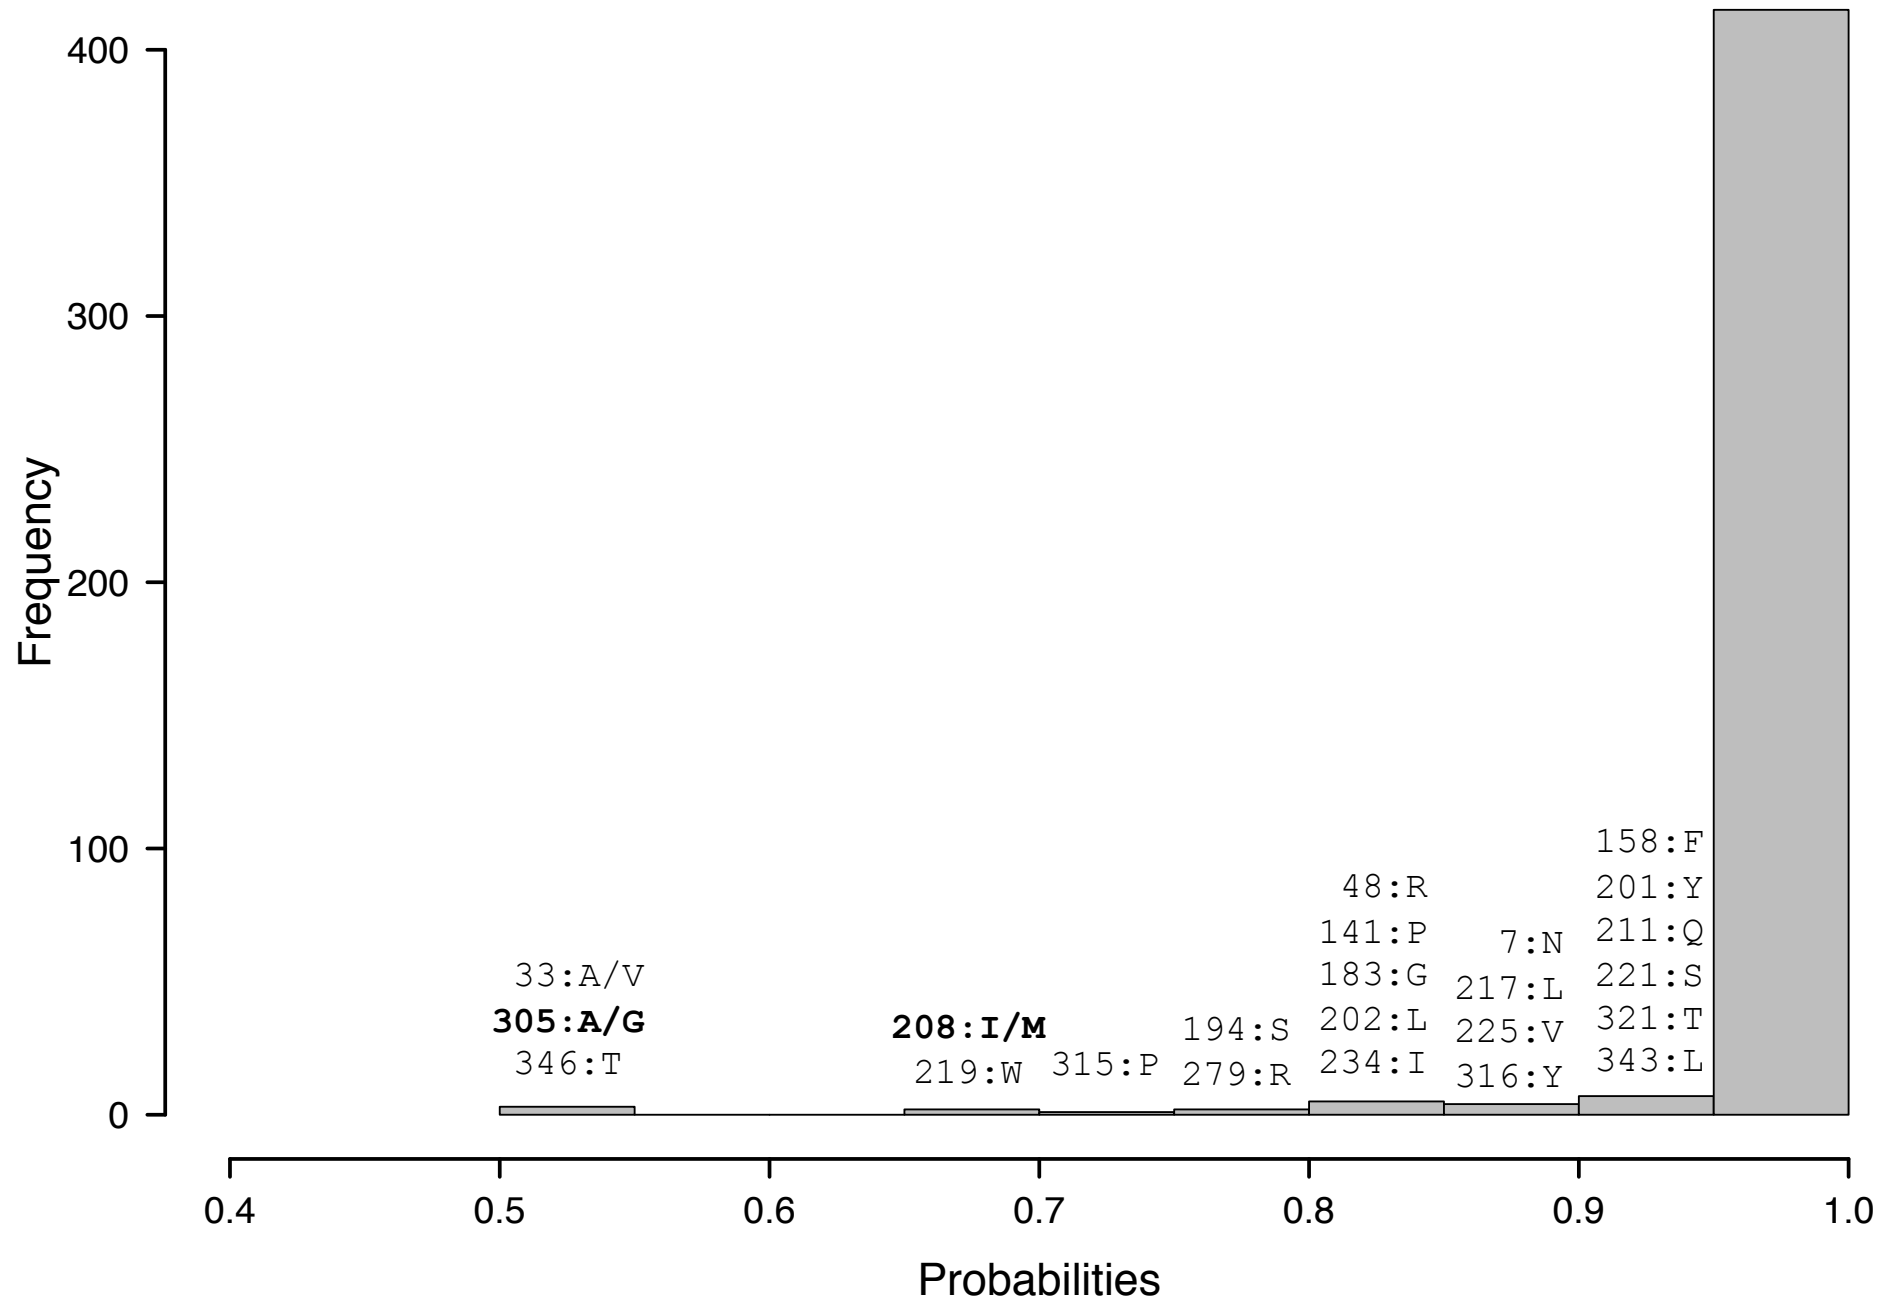

Supplement: supp [file elife-50253-supp-v1.zip]
